# Supplementary material
Source: publisher figshare collection journal article supplement (https://tandf.figshare.com/ndownloader/files/17267945)
Supplement: Supplementary file 1 [file 17267945]

# **Appendix**

*Table A1. Seat position adjustments for the older participants in the preferred position.*

*Table A2. Seat position adjustments for the younger participants in the preferred position.*

*Table A3 Structured interview questions, which were asked when the participant was seated in the self-adjusted seat position during 10 minutes.*

| 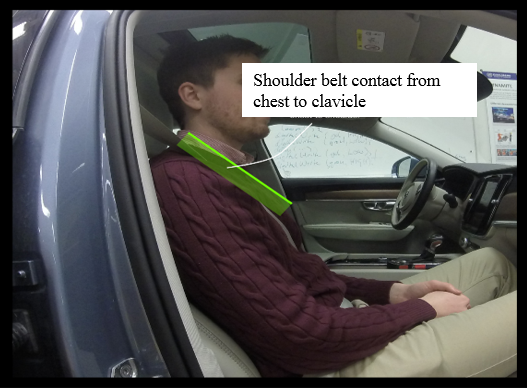 | 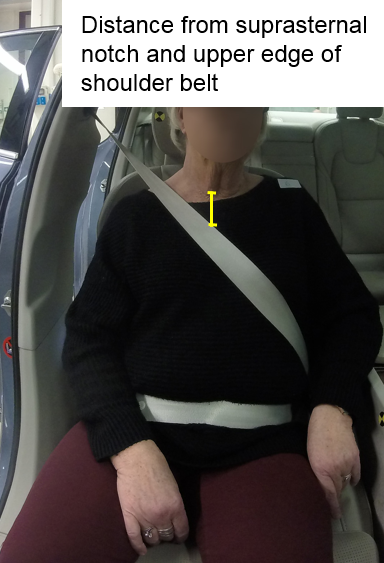 |
| --- | --- |

*Figure A1. To the left; shoulder belt contact with the clavicle was assessed from the lateral view. Distance between the suprasternal notch to the upper edge of the shoulder belt.*

| 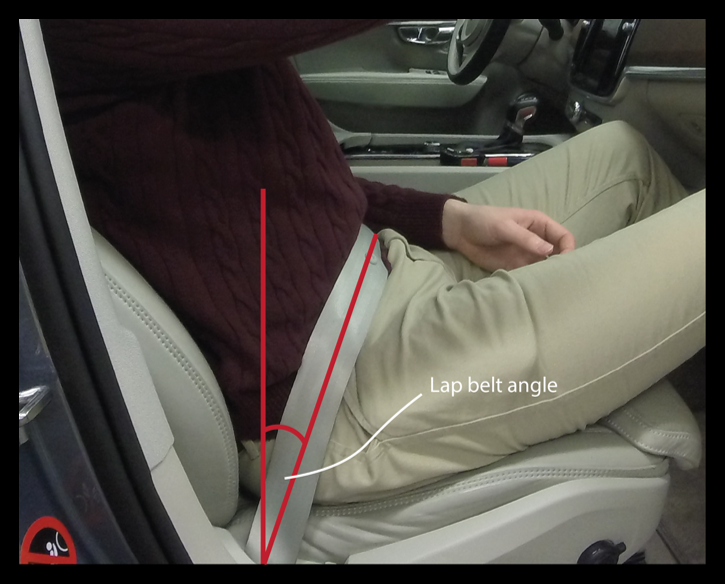 | 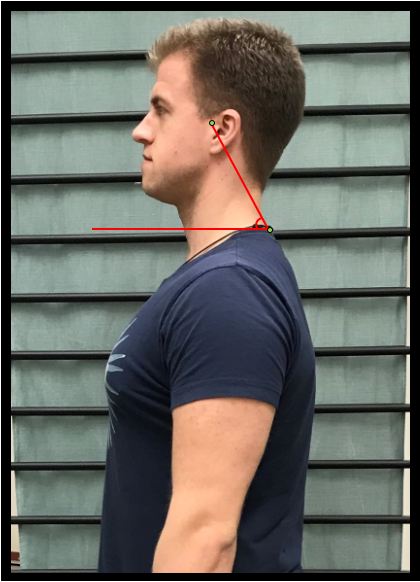 |
| --- | --- |

*Figure A2. Left; Lap belt angle measured from vertical line to the centerline of the lap belt, drawn from the anchorage point along the lap belt. Right: The CVA angle, measured from horizontal line, and the line between the ear and C7.*

*Table A3. Anthropometric data and results for the older occupants*

*Table A4. Anthropometric data and results for the younger occupants*

*Table A5. Total number of non-optimal belt fits per individual participant.*
